# Supplementary material
Source: Springer Nature journal article supplement (https://www.springermedizin.de/resource/supplementary/12889_2010_2490_MOESM1_ESM.pdf/9486092)

### ROC Curves for Comparisons

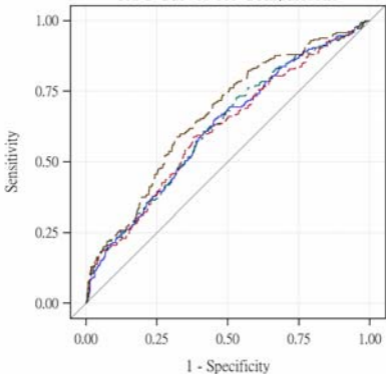

ROC Curve (Area)

- BMI (0.6182)
- - - WHR (0.6129)
- - - WAIST (0.6229)
- FAT (0.6661)

Supplement: MOESM1 [file 9486092]
